# Supplementary material for: Hospitalization and Survival in Patients Using Epoprostenol for Injection in the PROSPECT Observational Study
Source: PubMed Central journal article supplement — Chest. 2014 Oct 16;147(2):484–94. doi: 10.1378/chest.14-1004 (PMC4314821; doi:10.1378/chest.14-1004), 2014-10-16
Supplement: chest_147_2_484_ds01.pdf [file chest_147_2_484_ds01.pdf]

# Hospitalization and Survival in Patients Using Epoprostenol for Injection in the PROSPECT Observational Study

Robert P. Frantz, MD; Robert J. Schilz, DO, PhD, FCCP; Murali M. Chakinala, MD, FCCP; David B. Badesch, MD, FCCP; Adaani E. Frost, MD, FCCP; Vallerie V. McLaughlin, MD, FCCP; Robyn J. Barst, MD †; Daniel M. Rosenberg, PhD; Dave P. Miller, MS; Brian K. Hartline, MD; Wade W. Benton, PharmD; and Harrison W. Farber, MD, FCCP

CHEST 2015; 147(2):484–494

**e-Table 1.** Targeted Data Collection by Study Visit

| Data                                                       | Enrollment Visit | Quarterly Visits (months 3, 6, 9 and 12) | As Event Occurs |
|------------------------------------------------------------|------------------|------------------------------------------|-----------------|
| Signed Informed Consent                                    | X                |                                          |                 |
| Demographics <sup>a</sup>                                  | X                |                                          |                 |
| Medical History <sup>b</sup>                               | X                |                                          |                 |
| Patient Evaluation                                         |                  |                                          |                 |
| Physical Exam                                              | X                | X                                        |                 |
| Vital Signs                                                | X                | X                                        |                 |
| Weight and Height                                          | X                | X                                        |                 |
| Targeted Lab Values <sup>c</sup>                           | X                | X                                        |                 |
| Right Heart Catheterization                                | X                | X                                        |                 |
| Pulmonary Function Test                                    | X                | X                                        |                 |
| Echocardiogram                                             | X                | X                                        |                 |
| Functional Status Evaluation                               |                  |                                          |                 |
| 6 Minute Walk Distance                                     | X                | X                                        |                 |
| NYHA Functional Class                                      | X                | X                                        |                 |
| Concomitant PAH medications                                | X                | X                                        |                 |
| RTS-Epo dosing and titration information (medications log) | X                | X                                        |                 |
| Blood Stream Infection Log <sup>d</sup>                    |                  |                                          | X               |
| Serious Adverse Events                                     |                  |                                          | X               |
| Hospitalizations                                           |                  |                                          | X               |
| Death <sup>e</sup>                                         |                  |                                          | X               |

NYHA, New York Heart Association; PAH, Pulmonary arterial hypertension; RTS-Epo, prolonged Room Temperature Stable epoprostenol (Epoprostenol for Injection, Velettri®)

- a. Includes age, gender, and race
- b. Includes date and method of PAH diagnosis, PAH etiology, and past medical conditions at study entry
- c. Includes B type natriuretic peptide (BNP), N-terminal prohormone brain natriuretic peptide (NT-proBNP), C-reactive protein (CRP), creatinine, blood urea nitrogen (BUN), plasma sodium, platelet count, and uric acid
- d. History of blood stream infection (BSI) including organism, if identified
- e. Including cause of death

*Online supplements are not copyedited prior to posting.*

**e-Table 2:** Reasons for RTS-Epo Initiation by Prostacyclin History

|                                       | Overall     | Parenteral-Naïve | Parenteral-Transitioned |
|---------------------------------------|-------------|------------------|-------------------------|
|                                       | N=336       | N=147            | N=189                   |
| Reason for Veletri Initiation*, n (%) |             |                  |                         |
| Initiation of First PAH Medication    | 54 (16.1%)  | 47 (32.0%)       | 7 (3.7%)                |
| PAH Progression                       | 111 (33.0%) | 84 (57.1%)       | 27 (14.3%)              |
| PAH Stable but not Optimal            | 12 (3.6%)   | 5 (3.4%)         | 7 (3.7%)                |
| Compliance Issue                      | 8 (2.4%)    | 2 (1.4%)         | 6 (3.2%)                |
| Patient Request                       | 83 (24.7%)  | 4 (2.7%)         | 79 (41.8%)              |
| Side Effect                           | 2 (0.6%)    | 2 (1.4%)         | 0 (0.0%)                |
| Other <sup>†</sup>                    | 90 (26.8%)  | 10 (6.8%)        | 80 (42.3%)              |

\*Column percent do not add up to be 100% because patient could select more than one reason for initiation of RTS-Epo

<sup>†</sup>Switch from other epoprostenol, convenience, insurance reasons, cost savings, physician request, newly available therapy, potential for less line infections

*Online supplements are not copyedited prior to posting.*
